# Supplementary material for: Is There a Rise in the Importance of Socioemotional Skills in the Labor Market? Evidence From a Trend Study Among College Graduates
Source: PubMed Central journal article supplement (PMC7392119; doi:10.3389/fpsyg.2020.01710), 2020-07-16
Supplement: Data_Sheet_1.pdf [file Data_Sheet_1.pdf]

# Supplementary Material

Is there a rise in the importance of socioemotional skills in the labor market? Evidence from a trend study among college graduates

Jim Allen, Barbara Belfi and Lex Borghans

**Frontiers in Psychology – Personality and Social Psychology**

doi: 10.3389/fpsyg.2020.01710

## Appendix A

Table A1 Analysis of required skills, full models (part 1)

|                                             | working<br>independ-<br>ently |          | working to<br>plan        |          | alertness                 |          | explaining                |          | collaboration             |          | information<br>gathering  |          |
|---------------------------------------------|-------------------------------|----------|---------------------------|----------|---------------------------|----------|---------------------------|----------|---------------------------|----------|---------------------------|----------|
|                                             | <i>b</i><br>( <i>SE</i> )     | <i>p</i> | <i>b</i><br>( <i>SE</i> ) | <i>p</i> | <i>b</i><br>( <i>SE</i> ) | <i>p</i> | <i>b</i><br>( <i>SE</i> ) | <i>p</i> | <i>b</i><br>( <i>SE</i> ) | <i>p</i> | <i>b</i><br>( <i>SE</i> ) | <i>p</i> |
| Linear trend                                | 0.001<br>(0.004)              |          | 0.013<br>(0.002)          | **       | 0.005<br>(0.005)          |          | 0.002<br>(0.004)          |          | 0.008<br>(0.002)          | **       | 0.005<br>(0.002)          | *        |
| Economic cycle                              | -0.049<br>(0.297)             |          | -0.376<br>(0.201)         |          | 0.111<br>(0.372)          |          | 0.257<br>(0.301)          |          | -0.255<br>(0.102)         | *        | 0.199<br>(0.207)          |          |
| Gender (female)                             | 0.254<br>(0.007)              | **       | 0.061<br>(0.011)          | **       | 0.092<br>(0.013)          | **       | 0.119<br>(0.014)          | **       | 0.212<br>(0.012)          | **       | 0.075<br>(0.013)          | **       |
| Age                                         | -0.006<br>(0.002)             | **       | -0.007<br>(0.003)         | *        | -0.020<br>(0.003)         | **       | -0.018<br>(0.003)         | **       | -0.022<br>(0.003)         | **       | -0.006<br>(0.004)         |          |
| Broad field of study<br>(ref: economics)    |                               |          |                           |          |                           |          |                           |          |                           |          |                           |          |
| <i>agriculture and food</i>                 | 0.022<br>(0.047)              |          | 0.168<br>(0.022)          | **       | -0.300<br>(0.044)         | **       | -0.201<br>(0.053)         | **       | -0.207<br>(0.031)         | **       | -0.072<br>(0.033)         | *        |
| <i>teaching and</i>                         | -0.091<br>(0.03)              | **       | -0.268<br>(0.024)         | **       | -0.125<br>(0.027)         | **       | -0.021<br>(0.034)         |          | -0.007<br>(0.032)         |          | -0.324<br>(0.022)         | **       |
| <i>technical</i>                            | -0.156<br>(0.029)             | **       | 0.115<br>(0.017)          | **       | -0.467<br>(0.036)         | **       | -0.358<br>(0.047)         | **       | -0.204<br>(0.032)         | **       | -0.110<br>(0.023)         | **       |
| <i>health studies</i>                       | -0.104<br>(0.031)             | **       | 0.180<br>(0.019)          | **       | -0.370<br>(0.04)          | **       | -0.260<br>(0.044)         | **       | -0.216<br>(0.03)          | **       | -0.017<br>(0.019)         |          |
| <i>social studies</i>                       | 0.029<br>(0.029)              |          | 0.027<br>(0.028)          |          | -0.390<br>(0.034)         | **       | -0.144<br>(0.03)          | **       | -0.039<br>(0.033)         |          | -0.139<br>(0.026)         | **       |
| Region (ref: west)                          |                               |          |                           |          |                           |          |                           |          |                           |          |                           |          |
| <i>north</i>                                | 0.027<br>(0.022)              |          | 0.024<br>(0.019)          |          | -0.012<br>(0.02)          |          | 0.012<br>(0.013)          |          | -0.003<br>(0.019)         |          | 0.014<br>(0.016)          |          |
| <i>east</i>                                 | 0.000<br>(0.016)              |          | 0.002<br>(0.012)          |          | -0.018<br>(0.015)         |          | -0.010<br>(0.012)         |          | -0.035<br>(0.014)         | *        | -0.016<br>(0.014)         |          |
| <i>south</i>                                | 0.001<br>(0.014)              |          | 0.029<br>(0.01)           | **       | -0.010<br>(0.01)          |          | -0.007<br>(0.012)         |          | 0.023<br>(0.01)           | *        | -0.002<br>(0.01)          |          |
| Migration background<br>(ref: native Dutch) |                               |          |                           |          |                           |          |                           |          |                           |          |                           |          |
| <i>western (excl. native</i>                | 0.007<br>(0.029)              |          | 0.043<br>(0.018)          | *        | 0.057<br>(0.026)          | *        | 0.086<br>(0.03)           | **       | 0.097<br>(0.029)          | **       | 0.064<br>(0.021)          | **       |
| <i>non-western</i>                          | -0.019<br>(0.021)             |          | 0.037<br>(0.017)          | *        | 0.029<br>(0.021)          |          | 0.042<br>(0.018)          | *        | 0.095<br>(0.022)          | **       | 0.041<br>(0.025)          |          |
| Constant                                    | 1.694<br>(0.032)              | **       | 0.690<br>(0.016)          | **       | 1.336<br>(0.035)          | **       | 1.504<br>(0.029)          | **       | 1.269<br>(0.011)          | **       | 1.145<br>(0.015)          | **       |
| cut 1                                       | -1.362<br>(0.046)             | **       | -1.161<br>(0.017)         | **       | -1.317<br>(0.029)         | **       | -1.444<br>(0.032)         | **       | -1.284<br>(0.026)         | **       | -1.407<br>(0.018)         | **       |
| cut 3 = - cut 2                             | -0.564<br>(0.03)              | **       | -0.413<br>(0.017)         | **       | -0.520<br>(0.034)         | **       | -0.599<br>(0.026)         | **       | -0.510<br>(0.013)         | **       | -0.557<br>(0.017)         | **       |
| cut 4                                       | 1.972<br>(0.039)              | **       | 1.499<br>(0.017)          | **       | 1.861<br>(0.039)          | **       | 1.963<br>(0.037)          | **       | 1.880<br>(0.016)          | **       | 1.995<br>(0.023)          | **       |
| Pseudo R <sup>2</sup>                       | 0.010                         |          | 0.009                     |          | 0.011                     |          | 0.011                     |          | 0.012                     |          | 0.005                     |          |

Table A1 Analysis of required skills, full models (part 2)

|                                                               | creativity                |          | learning ability          |          | logical reasoning         |          | occupation-specific knowledge |          | interdisciplinary knowledge |          | digital literacy          |          |
|---------------------------------------------------------------|---------------------------|----------|---------------------------|----------|---------------------------|----------|-------------------------------|----------|-----------------------------|----------|---------------------------|----------|
|                                                               | <i>b</i><br>( <i>SE</i> ) | <i>p</i> | <i>b</i><br>( <i>SE</i> ) | <i>p</i> | <i>b</i><br>( <i>SE</i> ) | <i>p</i> | <i>b</i><br>( <i>SE</i> )     | <i>p</i> | <i>b</i><br>( <i>SE</i> )   | <i>p</i> | <i>b</i><br>( <i>SE</i> ) | <i>p</i> |
| Linear trend                                                  | 0.006<br>(0.003)          |          | 0.002<br>(0.003)          |          | 0.021<br>(0.002)          | **       | 0.013<br>(0.003)              | **       | 0.008<br>(0.005)            |          | 0.014<br>(0.003)          | **       |
| Economic cycle                                                | 0.179<br>(0.214)          |          | -0.030<br>(0.21)          |          | -0.743<br>(0.289)         | **       | -0.320<br>(0.251)             |          | -0.435<br>(0.319)           |          | -0.159<br>(0.227)         |          |
| Gender (female)                                               | 0.174<br>(0.012)          | **       | 0.147<br>(0.012)          | **       | 0.080<br>(0.013)          | **       | 0.063<br>(0.012)              | **       | 0.006<br>(0.012)            |          | 0.013<br>(0.014)          |          |
| Age                                                           | -0.014<br>(0.003)         | **       | -0.023<br>(0.003)         | **       | -0.019<br>(0.004)         | **       | -0.024<br>(0.003)             | **       | 0.003<br>(0.003)            |          | -0.010<br>(0.004)         | **       |
| Broad field of study (ref:<br><i>agriculture and food</i> )   | -0.031<br>(0.047)         |          | 0.030<br>(0.043)          |          | 0.054<br>(0.026)          | *        | 0.034<br>(0.051)              |          | -0.091<br>(0.038)           | *        | 0.208<br>(0.036)          | **       |
| <i>teaching and education</i>                                 | 0.128<br>(0.035)          | **       | 0.061<br>(0.028)          | *        | -0.277<br>(0.027)         | **       | 0.202<br>(0.016)              | **       | 0.012<br>(0.016)            |          | -0.051<br>(0.033)         |          |
| <i>technical</i>                                              | -0.005<br>(0.033)         |          | 0.005<br>(0.02)           |          | 0.044<br>(0.025)          |          | -0.175<br>(0.032)             | **       | -0.151<br>(0.018)           | **       | 0.266<br>(0.025)          | **       |
| <i>health studies</i>                                         | -0.114<br>(0.041)         | **       | -0.063<br>(0.017)         | **       | -0.021<br>(0.027)         |          | -0.188<br>(0.025)             | **       | -0.054<br>(0.018)           | **       | 0.312<br>(0.029)          | **       |
| <i>social studies</i>                                         | -0.144<br>(0.031)         | **       | 0.085<br>(0.028)          | **       | 0.112<br>(0.028)          | **       | 0.203<br>(0.027)              | **       | -0.116<br>(0.033)           | **       | 0.056<br>(0.029)          |          |
| Region (ref: west)                                            |                           |          |                           |          |                           |          |                               |          |                             |          |                           |          |
| <i>north</i>                                                  | 0.018<br>(0.025)          |          | -0.003<br>(0.019)         |          | -0.030<br>(0.018)         |          | 0.030<br>(0.02)               |          | 0.059<br>(0.016)            | **       | -0.008<br>(0.018)         |          |
| <i>east</i>                                                   | 0.008<br>(0.012)          |          | -0.032<br>(0.011)         | **       | -0.050<br>(0.018)         | **       | 0.010<br>(0.015)              |          | 0.003<br>(0.009)            |          | -0.022<br>(0.01)          | *        |
| <i>south</i>                                                  | 0.005<br>(0.012)          |          | -0.022<br>(0.011)         | *        | -0.037<br>(0.011)         | **       | 0.030<br>(0.01)               | **       | -0.013<br>(0.011)           |          | 0.010<br>(0.013)          |          |
| Migration background (ref:<br><i>western (excl. native)</i> ) | 0.055<br>(0.018)          | **       | 0.057<br>(0.026)          | *        | 0.065<br>(0.021)          | **       | 0.023<br>(0.03)               |          | 0.048<br>(0.027)            |          | 0.118<br>(0.02)           | **       |
| <i>non-western</i>                                            | -0.007<br>(0.016)         |          | 0.106<br>(0.024)          | **       | 0.038<br>(0.022)          |          | -0.017<br>(0.022)             |          | 0.086<br>(0.011)            | **       | 0.107<br>(0.027)          | **       |
| Constant                                                      | 1.033<br>(0.023)          | **       | 1.161<br>(0.024)          | **       | 1.360<br>(0.022)          | **       | 1.088<br>(0.023)              | **       | 0.383<br>(0.038)            | **       | 0.796<br>(0.021)          | **       |
| cut 1                                                         | -1.284<br>(0.023)         | **       | -1.288<br>(0.021)         | **       | -1.399<br>(0.054)         | **       | -1.310<br>(0.022)             | **       | -1.642<br>(0.044)           | **       | -1.384<br>(0.015)         | **       |
| cut 3 = - cut 2                                               | -0.491<br>(0.023)         | **       | -0.508<br>(0.024)         | **       | -0.594<br>(0.027)         | **       | -0.528<br>(0.022)             | **       | -0.623<br>(0.041)           | **       | -0.517<br>(0.021)         | **       |
| cut 4                                                         | 1.785<br>(0.027)          | **       | 1.815<br>(0.026)          | **       | 2.135<br>(0.023)          | **       | 2.141<br>(0.023)              | **       | 2.160<br>(0.033)            | **       | 1.810<br>(0.029)          | **       |
| Pseudo R <sup>2</sup>                                         | 0.006                     |          | 0.005                     |          | 0.010                     |          | 0.014                         |          | 0.002                       |          | 0.009                     |          |

\*  $p < 0.05$ , \*\*  $p < 0.01$ .

Table A2 Analysis of effects on wages, full models (part 1)

|                | working independently     |          | working to plan           |          | alertness                 |          | explaining                |          | collaboration             |          | information gathering     |          |
|----------------|---------------------------|----------|---------------------------|----------|---------------------------|----------|---------------------------|----------|---------------------------|----------|---------------------------|----------|
|                | <i>b</i><br>( <i>SE</i> ) | <i>p</i> | <i>b</i><br>( <i>SE</i> ) | <i>p</i> | <i>b</i><br>( <i>SE</i> ) | <i>p</i> | <i>b</i><br>( <i>SE</i> ) | <i>p</i> | <i>b</i><br>( <i>SE</i> ) | <i>p</i> | <i>b</i><br>( <i>SE</i> ) | <i>p</i> |
| Required skill | 0.006<br>(0.001)          | **       | 0.003<br>(0.002)          |          | 0.015<br>(0.003)          | **       | 0.017<br>(0.002)          | **       | 0.002<br>(0.002)          |          | 0.006<br>(0.001)          | **       |
| Linear trend   | 0.000<br>(0)              |          | 0.000<br>(0)              |          | 0.000<br>(0)              |          | 0.000<br>(0)              |          | 0.000<br>(0)              |          | 0.001<br>(0)              | *        |
| Economic cycle | 0.033<br>(0.018)          |          | 0.000<br>(0.03)           |          | -0.023<br>(0.035)         |          | -0.048<br>(0.021)         | *        | -0.034<br>(0.021)         |          | 0.067<br>(0.023)          | *        |
| Survey year    |                           |          |                           |          |                           |          |                           |          |                           |          |                           |          |
| 2005           | -0.007<br>(0.001)         | **       | -0.006<br>(0.001)         | **       | -0.006<br>(0.001)         | **       | -0.006<br>(0.001)         | **       | -0.007<br>(0.001)         | **       | -0.007<br>(0.001)         | **       |
| 2006           | 0.006<br>(0.006)          |          | 0.016<br>(0.008)          |          | 0.023<br>(0.011)          |          | 0.031<br>(0.007)          | **       | 0.024<br>(0.007)          | **       | -0.005<br>(0.007)         |          |
| 2007           | 0.029<br>(0.008)          | **       | 0.042<br>(0.009)          | **       | 0.051<br>(0.015)          | **       | 0.062<br>(0.01)           | **       | 0.052<br>(0.01)           | **       | 0.013<br>(0.008)          |          |
| 2008           | 0.036<br>(0.008)          | **       | 0.050<br>(0.011)          | **       | 0.062<br>(0.017)          | **       | 0.073<br>(0.011)          | **       | 0.060<br>(0.011)          | **       | 0.019<br>(0.01)           |          |
| 2009           | 0.039<br>(0.006)          | **       | 0.049<br>(0.008)          | **       | 0.059<br>(0.013)          | **       | 0.067<br>(0.009)          | **       | 0.054<br>(0.009)          | **       | 0.024<br>(0.007)          | **       |
| 2010           | 0.019<br>(0.005)          | **       | 0.023<br>(0.005)          | **       | 0.030<br>(0.011)          | *        | 0.035<br>(0.007)          | **       | 0.023<br>(0.008)          | *        | 0.006<br>(0.006)          |          |
| 2011           | 0.004<br>(0.006)          |          | 0.007<br>(0.006)          |          | 0.016<br>(0.012)          |          | 0.020<br>(0.008)          | *        | 0.006<br>(0.009)          |          | -0.009<br>(0.007)         |          |
| 2012           | -0.020<br>(0.006)         | **       | -0.018<br>(0.006)         | *        | -0.009<br>(0.013)         |          | -0.005<br>(0.009)         |          | -0.021<br>(0.009)         | *        | -0.035<br>(0.007)         | **       |
| 2013           | -0.050<br>(0.007)         | **       | -0.054<br>(0.008)         | **       | -0.048<br>(0.012)         | **       | -0.048<br>(0.008)         | **       | -0.063<br>(0.009)         | **       | -0.061<br>(0.008)         | **       |
| 2015           | -0.059<br>(0.008)         | **       | -0.061<br>(0.008)         | **       | -0.053<br>(0.014)         | **       | -0.050<br>(0.009)         | **       | -0.068<br>(0.01)          | **       | -0.075<br>(0.009)         | **       |
| 2015           | -0.066<br>(0.009)         | **       | -0.066<br>(0.009)         | **       | -0.055<br>(0.016)         | **       | -0.050<br>(0.011)         | **       | -0.071<br>(0.012)         | **       | -0.084<br>(0.01)          | **       |
| 2016           | -0.043<br>(0.01)          | **       | -0.038<br>(0.01)          | **       | -0.022<br>(0.02)          |          | -0.015<br>(0.014)         |          | -0.040<br>(0.015)         | *        | -0.067<br>(0.012)         | **       |
| 2017           | -0.031<br>(0.012)         | *        | -0.021<br>(0.013)         |          | 0.000<br>(0.025)          |          | 0.012<br>(0.017)          |          | -0.017<br>(0.018)         |          | -0.062<br>(0.014)         | **       |

Table A2 Analysis of effects on wages, full models (part 2)

|                                          | working independently     |          | working to plan           |          | alertness                 |          | explaining                |          | collaboration             |          | information gathering     |          |
|------------------------------------------|---------------------------|----------|---------------------------|----------|---------------------------|----------|---------------------------|----------|---------------------------|----------|---------------------------|----------|
|                                          | <i>b</i><br>( <i>SE</i> ) | <i>p</i> | <i>b</i><br>( <i>SE</i> ) | <i>p</i> | <i>b</i><br>( <i>SE</i> ) | <i>p</i> | <i>b</i><br>( <i>SE</i> ) | <i>p</i> | <i>b</i><br>( <i>SE</i> ) | <i>p</i> | <i>b</i><br>( <i>SE</i> ) | <i>p</i> |
| Gender (female)                          | -0.052<br>(0.003)         | **       | -0.051<br>(0.003)         | **       | -0.052<br>(0.003)         | **       | -0.052<br>(0.003)         | **       | -0.051<br>(0.003)         | **       | -0.052<br>(0.003)         | **       |
| Age                                      | 0.016<br>(0.001)          | **       | 0.016<br>(0.001)          | **       | 0.016<br>(0.001)          | **       | 0.016<br>(0.001)          | **       | 0.016<br>(0.001)          | **       | 0.016<br>(0.001)          | **       |
| Broad field of study<br>(ref: economics) |                           |          |                           |          |                           |          |                           |          |                           |          |                           |          |
| <i>agriculture and food</i>              | -0.068<br>(0.007)         | **       | -0.068<br>(0.007)         | **       | -0.065<br>(0.007)         | **       | -0.065<br>(0.007)         | **       | -0.067<br>(0.007)         | **       | -0.067<br>(0.008)         | **       |
| <i>teaching and education</i>            | -0.079<br>(0.011)         | **       | -0.079<br>(0.011)         | **       | -0.079<br>(0.011)         | **       | -0.080<br>(0.011)         | **       | -0.080<br>(0.011)         | **       | -0.077<br>(0.011)         | **       |
| <i>technical</i>                         | -0.057<br>(0.005)         | **       | -0.058<br>(0.005)         | **       | -0.053<br>(0.005)         | **       | -0.054<br>(0.005)         | **       | -0.057<br>(0.005)         | **       | -0.057<br>(0.005)         | **       |
| <i>health studies</i>                    | -0.065<br>(0.005)         | **       | -0.065<br>(0.005)         | **       | -0.062<br>(0.005)         | **       | -0.063<br>(0.005)         | **       | -0.065<br>(0.005)         | **       | -0.065<br>(0.005)         | **       |
| <i>social studies</i>                    | 0.036<br>(0.005)          | **       | 0.036<br>(0.005)          | **       | 0.039<br>(0.005)          | **       | 0.037<br>(0.005)          | **       | 0.036<br>(0.005)          | **       | 0.037<br>(0.004)          | **       |
| Region (ref: west)                       |                           |          |                           |          |                           |          |                           |          |                           |          |                           |          |
| <i>north</i>                             | -0.027<br>(0.006)         | **       | -0.027<br>(0.006)         | **       | -0.027<br>(0.006)         | **       | -0.028<br>(0.006)         | **       | -0.028<br>(0.006)         | **       | -0.027<br>(0.006)         | **       |
| <i>east</i>                              | -0.005<br>(0.003)         |          | -0.005<br>(0.003)         |          | -0.005<br>(0.003)         |          | -0.005<br>(0.003)         |          | -0.005<br>(0.003)         |          | -0.005<br>(0.003)         |          |
| <i>south</i>                             | 0.022<br>(0.002)          | **       | 0.022<br>(0.002)          | **       | 0.023<br>(0.002)          | **       | 0.022<br>(0.002)          | **       | 0.022<br>(0.002)          | **       | 0.022<br>(0.002)          | **       |
| Migration background                     |                           |          |                           |          |                           |          |                           |          |                           |          |                           |          |
| <i>western (excl. native)</i>            | -0.001<br>(0.004)         |          | -0.002<br>(0.005)         |          | -0.002<br>(0.005)         |          | -0.002<br>(0.005)         |          | -0.001<br>(0.005)         |          | -0.002<br>(0.005)         |          |
| <i>non-western</i>                       | 0.014<br>(0.003)          | **       | 0.014<br>(0.003)          | **       | 0.013<br>(0.003)          | **       | 0.013<br>(0.003)          | **       | 0.014<br>(0.003)          | **       | 0.014<br>(0.003)          | **       |
| Constant                                 | 2.637<br>(0.006)          | **       | 2.654<br>(0.007)          | **       | 2.603<br>(0.015)          | **       | 2.594<br>(0.009)          | **       | 2.657<br>(0.011)          | **       | 2.641<br>(0.006)          | **       |
| R <sup>2</sup>                           | 0.106                     |          | 0.105                     |          | 0.108                     |          | 0.108                     |          | 0.105                     |          | 0.186                     |          |

Table A2 Analysis of effects on wages, full models (part 3)

|                | creativity                |          | learning ability          |          | logical reasoning         |          | occupation-specific knowledge |          | interdisciplinary knowledge |          | digital literacy          |          |
|----------------|---------------------------|----------|---------------------------|----------|---------------------------|----------|-------------------------------|----------|-----------------------------|----------|---------------------------|----------|
|                | <i>b</i><br>( <i>SE</i> ) | <i>p</i> | <i>b</i><br>( <i>SE</i> ) | <i>p</i> | <i>b</i><br>( <i>SE</i> ) | <i>p</i> | <i>b</i><br>( <i>SE</i> )     | <i>p</i> | <i>b</i><br>( <i>SE</i> )   | <i>p</i> | <i>b</i><br>( <i>SE</i> ) | <i>p</i> |
| Required skill | 0.004<br>(0.002)          | *        | 0.004<br>(0.001)          | **       | 0.007<br>(0.002)          | **       | 0.014<br>(0.001)              | **       | 0.006<br>(0.002)            | **       | 0.002<br>(0.001)          |          |
| Linear trend   | 0.000<br>(0)              |          | 0.001<br>(0)              | **       | 0.001<br>(0)              | **       | 0.000<br>(0)                  |          | 0.000<br>(0)                |          | 0.001<br>(0)              | *        |
| Economic cycle | -0.015<br>(0.029)         |          | 0.008<br>(0.015)          |          | 0.019<br>(0.029)          |          | -0.026<br>(0.018)             |          | 0.002<br>(0.023)            |          | 0.046<br>(0.034)          |          |
| Survey year    |                           |          |                           |          |                           |          |                               |          |                             |          |                           |          |
| 2005           | -0.007<br>(0.001)         | **       | -0.009<br>(0.001)         | **       | -0.008<br>(0.001)         | **       | -0.005<br>(0.001)             | **       | -0.003<br>(0.001)           | **       | -0.006<br>(0.001)         | **       |
| 2006           | 0.018<br>(0.008)          | *        | 0.009<br>(0.004)          | *        | 0.006<br>(0.008)          |          | 0.022<br>(0.004)              | **       | 0.019<br>(0.005)            | **       | 0.002<br>(0.008)          |          |
| 2007           | 0.044<br>(0.01)           | **       | 0.033<br>(0.005)          | **       | 0.028<br>(0.01)           | *        | 0.050<br>(0.005)              | **       | 0.046<br>(0.006)            | **       | 0.024<br>(0.01)           | *        |
| 2008           | 0.053<br>(0.011)          | **       | 0.039<br>(0.005)          | **       | 0.034<br>(0.011)          | **       | 0.059<br>(0.006)              | **       | 0.057<br>(0.006)            | **       | 0.031<br>(0.01)           | **       |
| 2009           | 0.049<br>(0.008)          | **       | 0.037<br>(0.003)          | **       | 0.033<br>(0.008)          | **       | 0.053<br>(0.004)              | **       | 0.056<br>(0.004)            | **       | 0.033<br>(0.006)          | **       |
| 2010           | 0.020<br>(0.006)          | **       | 0.010<br>(0.002)          | **       | 0.008<br>(0.006)          |          | 0.023<br>(0.002)              | **       | 0.032<br>(0.003)            | **       | 0.012<br>(0.004)          | **       |
| 2011           | 0.003<br>(0.006)          |          | -0.008<br>(0.002)         | **       | -0.010<br>(0.006)         |          | 0.006<br>(0.003)              | *        | 0.018<br>(0.004)            | **       | -0.004<br>(0.005)         |          |
| 2012           | -0.023<br>(0.006)         | **       | -0.034<br>(0.002)         | **       | -0.037<br>(0.007)         | **       | -0.020<br>(0.004)             | **       | -0.007<br>(0.005)           |          | -0.029<br>(0.006)         | **       |
| 2013           | -0.061<br>(0.007)         | **       | -0.071<br>(0.005)         | **       | -0.074<br>(0.01)          | **       | -0.060<br>(0.006)             | **       | -0.040<br>(0.007)           | **       | -0.058<br>(0.01)          | **       |
| 2015           | -0.068<br>(0.008)         | **       | -0.080<br>(0.004)         | **       | -0.084<br>(0.01)          | **       | -0.066<br>(0.006)             | **       | -0.046<br>(0.007)           | **       | -0.069<br>(0.009)         | **       |
| 2015           | -0.073<br>(0.008)         | **       | -0.088<br>(0.004)         | **       | -0.092<br>(0.01)          | **       | -0.069<br>(0.006)             | **       | -0.049<br>(0.007)           | **       | -0.077<br>(0.009)         | **       |
| 2016           | -0.044<br>(0.01)          | **       | -0.064<br>(0.003)         | **       | -0.070<br>(0.012)         | **       | -0.038<br>(0.005)             | **       | -0.020<br>(0.006)           | **       | -0.056<br>(0.008)         | **       |
| 2017           | -0.025<br>(0.013)         |          | -0.049<br>(0.004)         | **       | -0.057<br>(0.014)         | **       | -0.017<br>(0.006)             | **       | -0.003<br>(0.007)           |          | -0.048<br>(0.01)          | **       |

Table A2 Analysis of effects on wages, full models (part 4)

|                                             | creativity                |          | learning ability          |          | logical reasoning         |          | occupation-specific knowledge |          | interdisciplinary knowledge |          | digital literacy          |          |
|---------------------------------------------|---------------------------|----------|---------------------------|----------|---------------------------|----------|-------------------------------|----------|-----------------------------|----------|---------------------------|----------|
|                                             | <i>b</i><br>( <i>SE</i> ) | <i>p</i> | <i>b</i><br>( <i>SE</i> ) | <i>p</i> | <i>b</i><br>( <i>SE</i> ) | <i>p</i> | <i>b</i><br>( <i>SE</i> )     | <i>p</i> | <i>b</i><br>( <i>SE</i> )   | <i>p</i> | <i>b</i><br>( <i>SE</i> ) | <i>p</i> |
| Gender (female)                             | -0.051<br>(0.003)         | **       | -0.052<br>(0.003)         | **       | -0.051<br>(0.003)         | **       | -0.051<br>(0.003)             | **       | -0.051<br>(0.003)           | **       | -0.051<br>(0.003)         | **       |
| Age                                         | 0.016<br>(0.001)          | **       | 0.016<br>(0.001)          | **       | 0.016<br>(0.001)          | **       | 0.016<br>(0.001)              | **       | 0.016<br>(0.001)            | **       | 0.016<br>(0.001)          | **       |
| Broad field of study<br>(ref: economics)    |                           |          |                           |          |                           |          |                               |          |                             |          |                           |          |
| <i>agriculture and food</i>                 | -0.067<br>(0.007)         | **       | -0.068<br>(0.007)         | **       | -0.068<br>(0.007)         | **       | -0.068<br>(0.007)             | **       | -0.068<br>(0.007)           | **       | -0.069<br>(0.007)         | **       |
| <i>teaching and education</i>               | -0.080<br>(0.011)         | **       | -0.080<br>(0.011)         | **       | -0.078<br>(0.011)         | **       | -0.082<br>(0.011)             | **       | -0.080<br>(0.011)           | **       | -0.081<br>(0.011)         | **       |
| <i>technical</i>                            | -0.058<br>(0.005)         | **       | -0.058<br>(0.005)         | **       | -0.058<br>(0.005)         | **       | -0.056<br>(0.005)             | **       | -0.057<br>(0.005)           | **       | -0.059<br>(0.005)         | **       |
| <i>health studies</i>                       | -0.065<br>(0.005)         | **       | -0.065<br>(0.005)         | **       | -0.065<br>(0.005)         | **       | -0.063<br>(0.005)             | **       | -0.065<br>(0.005)           | **       | -0.067<br>(0.005)         | **       |
| <i>social studies</i>                       | 0.036<br>(0.005)          | **       | 0.035<br>(0.005)          | **       | 0.035<br>(0.005)          | **       | 0.034<br>(0.004)              | **       | 0.036<br>(0.004)            | **       | 0.035<br>(0.005)          | **       |
| Region (ref: west)                          |                           |          |                           |          |                           |          |                               |          |                             |          |                           |          |
| <i>north</i>                                | -0.028<br>(0.006)         | **       | -0.028<br>(0.006)         | **       | -0.027<br>(0.006)         | **       | -0.027<br>(0.006)             | **       | -0.027<br>(0.006)           | **       | -0.027<br>(0.006)         | **       |
| <i>east</i>                                 | -0.005<br>(0.003)         |          | -0.005<br>(0.003)         |          | -0.005<br>(0.003)         |          | -0.005<br>(0.003)             |          | -0.004<br>(0.003)           |          | -0.005<br>(0.003)         |          |
| <i>south</i>                                | 0.022<br>(0.002)          | **       | 0.022<br>(0.002)          | **       | 0.023<br>(0.002)          | **       | 0.022<br>(0.002)              | **       | 0.023<br>(0.002)            | **       | 0.022<br>(0.002)          | **       |
| Migration background<br>(ref: native Dutch) |                           |          |                           |          |                           |          |                               |          |                             |          |                           |          |
| <i>western (excl. native)</i>               | -0.002<br>(0.005)         |          | -0.002<br>(0.005)         |          | -0.001<br>(0.005)         |          | -0.001<br>(0.005)             |          | -0.001<br>(0.005)           |          | -0.002<br>(0.005)         |          |
| <i>non-western</i>                          | 0.014<br>(0.003)          | **       | 0.013<br>(0.003)          | **       | 0.014<br>(0.003)          | **       | 0.014<br>(0.003)              | **       | 0.014<br>(0.003)            | **       | 0.013<br>(0.003)          | **       |
| Constant                                    | 2.650<br>(0.007)          | **       | 2.652<br>(0.004)          | **       | 2.638<br>(0.007)          | **       | 2.610<br>(0.005)              | **       | 2.641<br>(0.005)            | **       | 2.659<br>(0.006)          | **       |
| R <sup>2</sup>                              | 0.105                     |          | 0.107                     |          | 0.010                     |          | 0.108                         |          | 0.106                       |          | 0.106                     |          |

\* p < 0.05, \*\* p < 0.01.
